# Supplementary material for: Distinct myeloid antigen-presenting cells dictate differential fates of tumor-specific CD8+ T cells in pancreatic cancer
Source: JCI Insight. 2022 Apr 8;7(7):e151593. doi: 10.1172/jci.insight.151593 (PMC9057584; doi:10.1172/jci.insight.151593)
Supplement: Supplemental data [file jciinsight-7-151593-s076.pdf]

## Supplementary Figure 1

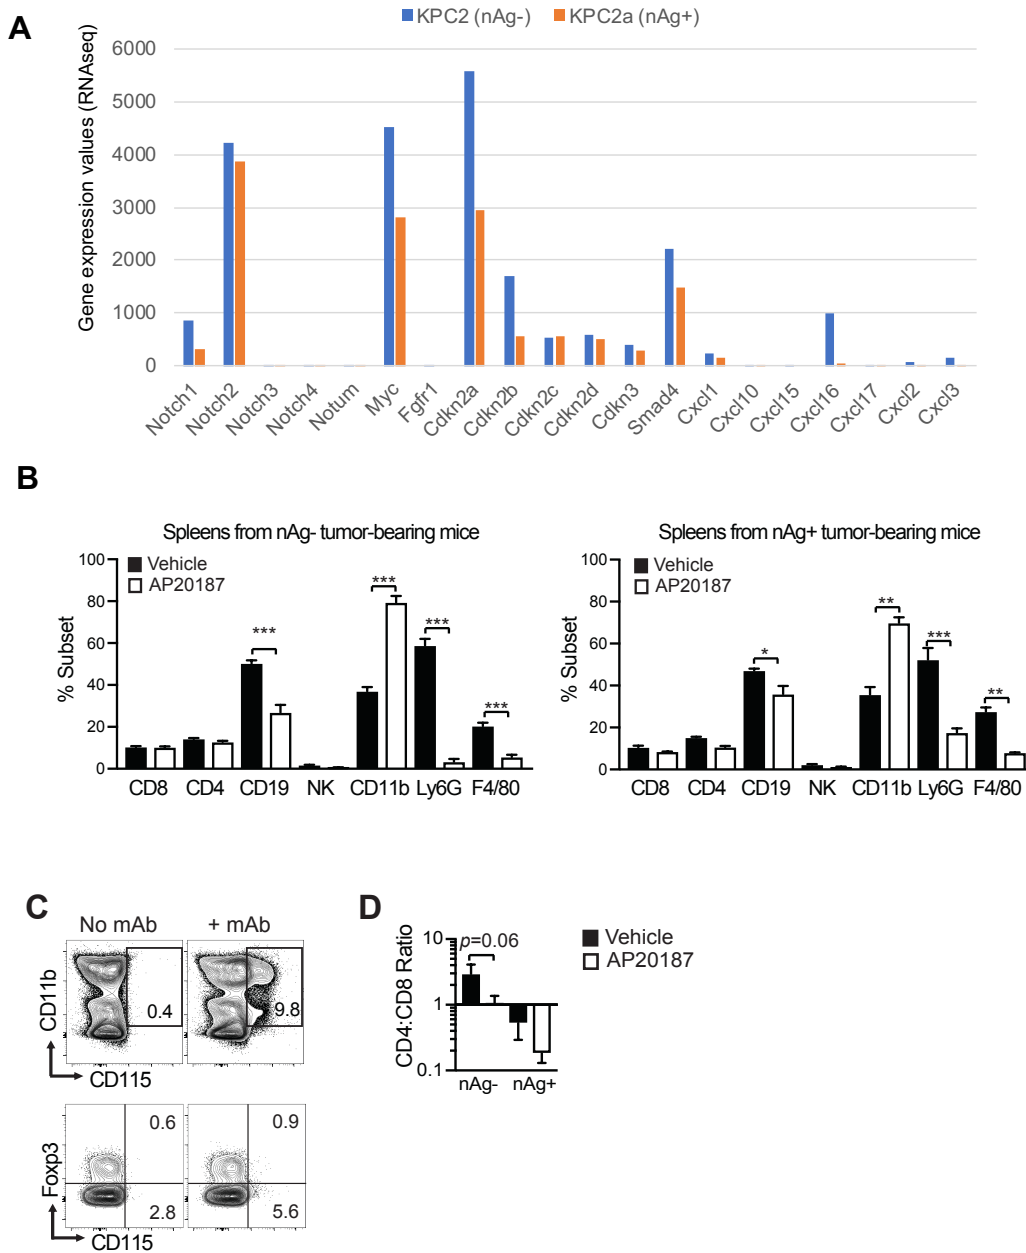

**Supplementary Figure 1. Role of tumor antigenicity on myeloid cells in pancreatic cancer. A)** Gene expression of CB+ and parental CB- KPC tumor cell line was determined by RNAseq. **B)** Mean frequency of immune cell subsets in the spleens from orthotopic tumor-bearing mice on day 14 posttumor. \* $p<0.05$ , \*\* $p<0.005$ , and \*\*\* $p<0.0005$  (student's T test). **C)** Representative staining of CD115 (Csf1r) on positive control (top, CD11b+ myeloid cells) or CD4+T cells (bottom). **D)** Ratio of CD4:CD8 T cells in nAg- or nAg+ tumors on day 15. Student's T test to compare ratio of 2 group data within each tumor cohort.

## Supplementary Figure 2

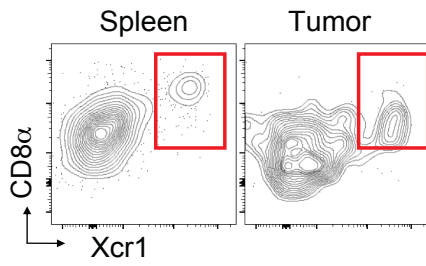

**Supplementary Figure 2. cDC1s co-express CD8 $\alpha$  and Xcr1 in orthotopic pancreatic tumor-bearing mice.** Representative FACS plots gated on live CD45+Lin-CD11c+MHCII+ cells on day 14 posttumor. Representative of n=5 mice per group.

### Supplementary Figure 3

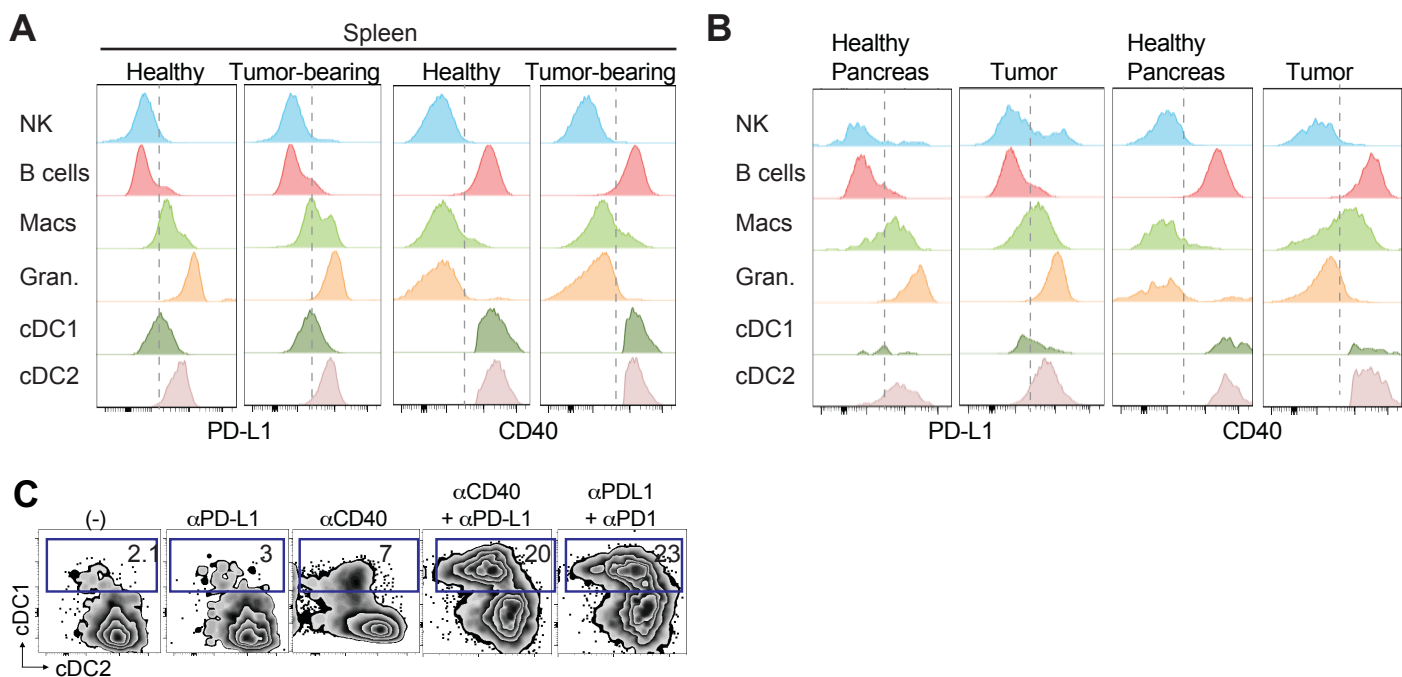

### Supplementary Figure 3. Expression of PD-L1 and CD40 by immune cells in nAg+ tumor-bearing mice.

**A)** Representative histograms of PD-L1 and CD40 expressed by the indicated splenic cell subsets from healthy or nAg+ tumor-bearing mice on day 21 posttumor. **B)** Representative histograms of PD-L1 and CD40 expressed by immune cells isolated from healthy pancreas or orthotopic nAg+ tumors on day 21 posttumor. **C)** Representative flow plots gated on live CD45+CD3-CD19-NK1.1-F4/80-Ly6G-CD11c+MHC class II+ cells from spleen on day 14 post tumor implantation (day 7 post immunotherapy).

## Supplementary Figure 4

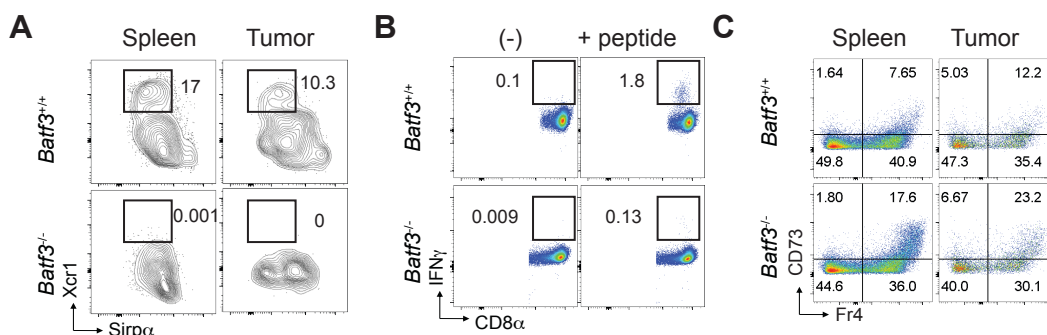

**Supplementary Figure 4. Failure to generate tumor-specific T cells and altered CD4 T cell phenotype in *Batf3*<sup>-/-</sup> mice.** **A)** Undetectable cDC1s in *Batf3*<sup>-/-</sup> tumor-bearing mice. Representative FACs plots of cDC1s (box) gated on live, CD45+Lin-CD11c+MHCII+ cells. n=5 mice per group. **B)** Undetectable IFN $\gamma$ + T cells in *Batf3*<sup>-/-</sup> tumor-bearing mice. Representative staining of splenocytes restimulated with CB<sub>101-109</sub> peptide for 4 h *ex vivo* with Golgiplug, stained for intracellular IFN $\gamma$  and analyzed by flow cytometry. Representative of n=4 mice per group. **C)** Expression of anergic T cell markers CD73 and Fr4 in conventional CD4+Foxp3- T cells isolated from spleen or tumor from *Batf3*<sup>+/+</sup> or *Batf3*<sup>-/-</sup> mice on day 14 posttumor. Representative of n=5 mice per group.

## Supplementary Figure 5

A

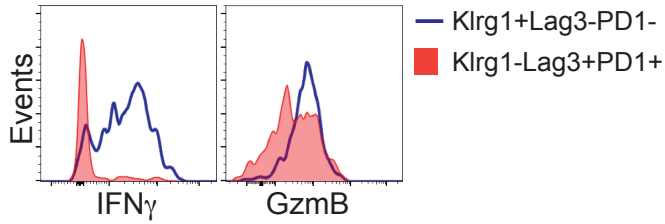

B

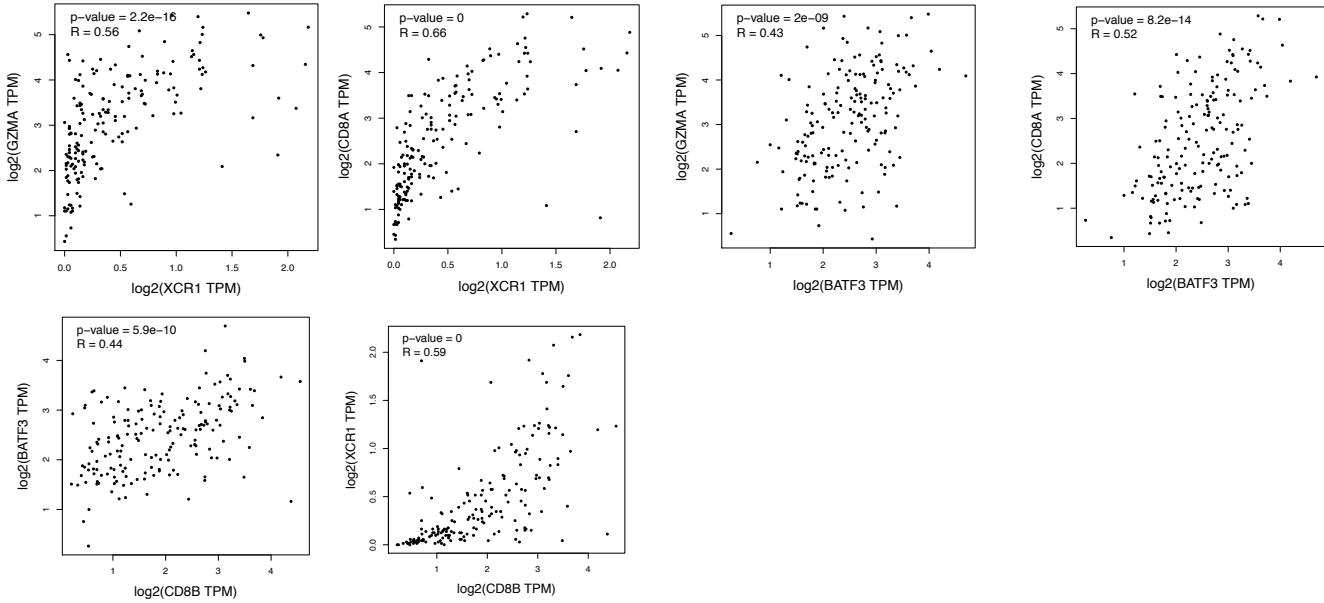

**Supplementary Figure 5. Klr1 and Lag3 are surrogate markers for two functional states of T cells in PDA and cytotoxic T cell genes correlate with cDC1 genes in human PDA.** A) IFN $\gamma$  and Granzyme B (GzmB) production from intratumoral Klr1<sup>+</sup>Lag3<sup>+</sup>PD1<sup>-</sup> vs. Klr1<sup>+</sup>Lag3<sup>+</sup>PD1<sup>+</sup> CD8<sup>+</sup> T cells cells following a 5 h *in vitro* stimulation with PMA and Ionomycin + Golgiplug on day 14 posttumor was determined by flow cytometry. B) Correlation between the cDC1 genes XCR1 and BATF3 and CD8 T cell genes from 178 human PDA samples using TCGA dataset and GEPIA (<http://gepia.cancer-pku.cn/>).

## Supplementary Figure 6

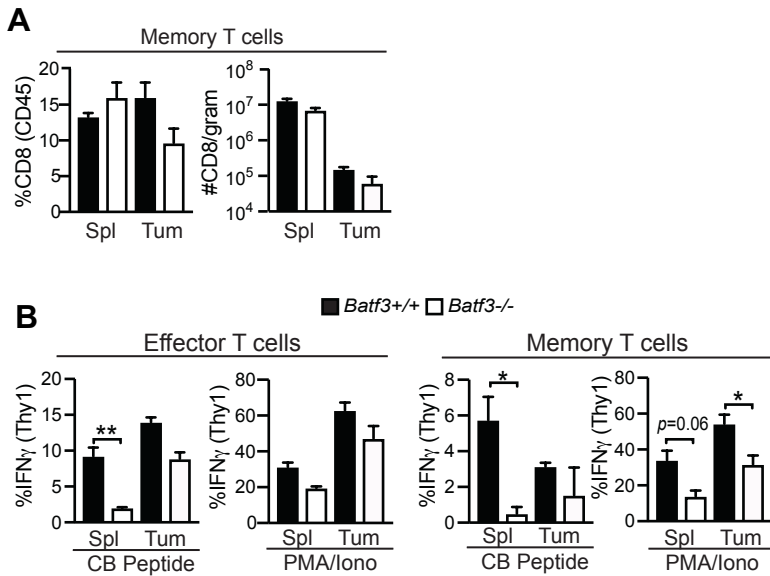

**Supplementary Figure 6. Host cDC1s are critical for re-activating adoptively transferred effector memory T cells.** **A)** Proportion of total CD8 T cells and overall number normalized to tissue gram in *Batf3*<sup>+/+</sup> and *Batf3*<sup>-/-</sup> tumor-bearing recipients of memory T cells. **B)** Proportion of Thy1.1+ (Thy1) T cells that produce IFN $\gamma$  in response to specific antigen (peptide) or non-specific stimulation (PMA+Ionomycin). Data are mean  $\pm$  S.E.M. n=5 mice per group. \* $p$ <0.05. Student's t-test was used to compare 2-group data.

# A

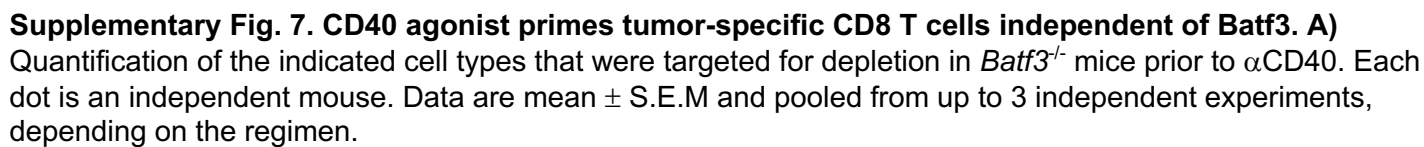

## Supplementary Figure 8

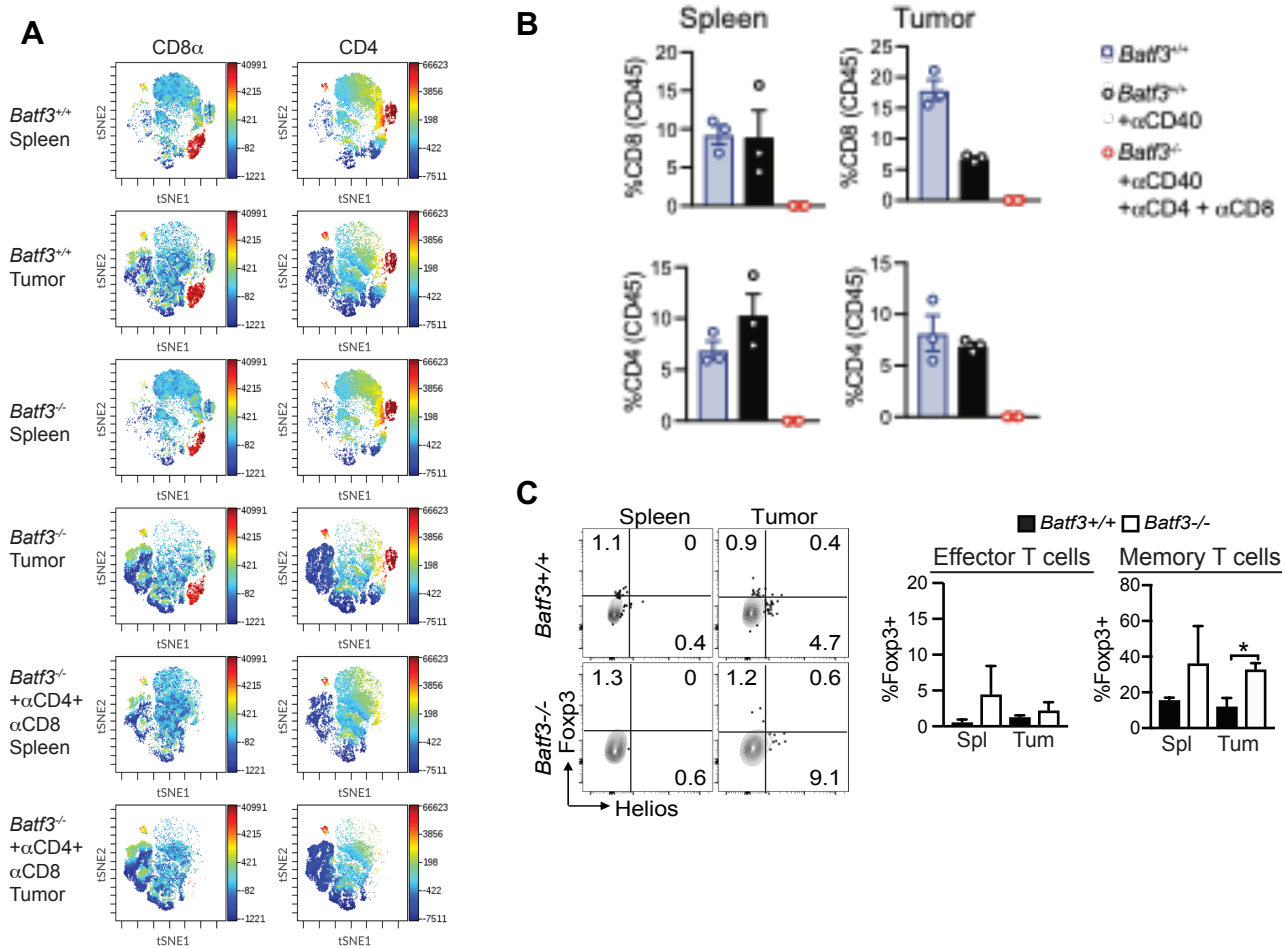

**Supplementary Figure 8. Antitumor activity in *Batf3*<sup>-/-</sup> mice treated with CD40 agonist is T cell independent.** **A)** VisNE analysis of concatenated flow cytometry samples from each cohort were analyzed using Cytobank software. **B)** Quantification of the frequency of CD4 and CD8 T cells among total CD45<sup>+</sup> cells in mice from A. Data are mean  $\pm$  SEM. n=3-4 mice per group. **C)** Phenotypic analysis of donor Thy1.1<sup>+</sup>CD8<sup>+</sup>tetramer<sup>+</sup> T cells (see Figure 7) in *Batf3*<sup>+/+</sup> or *Batf3*<sup>-/-</sup> tumor-bearing mice. Graphed data are mean  $\pm$  S.E.M. \*, p<0.05, student's T test to compare 2 group data (spleen or tumor assessed).
